# Supplementary material for: Opposing Regulation of Cancer Properties via KRT19-Mediated Differential Modulation of Wnt/β-Catenin/Notch Signaling in Breast and Colon Cancers
Source: PubMed Central journal article supplement (PMC6357186; doi:10.3390/cancers11010099), 2019-01-15
Supplement: cancers-11-00099-s001.pdf [file cancers-11-00099-s001.pdf]

# Supplementary Materials: Opposing Regulation of Cancer Properties via KRT19-Mediated Differential Modulation of Wnt/ $\beta$ -Catenin/Notch Signaling in Breast and Colon Cancers

Subbroto Kumar Saha, Yingfu Yin, Hee Sung Chae and Ssang-Goo Cho\*

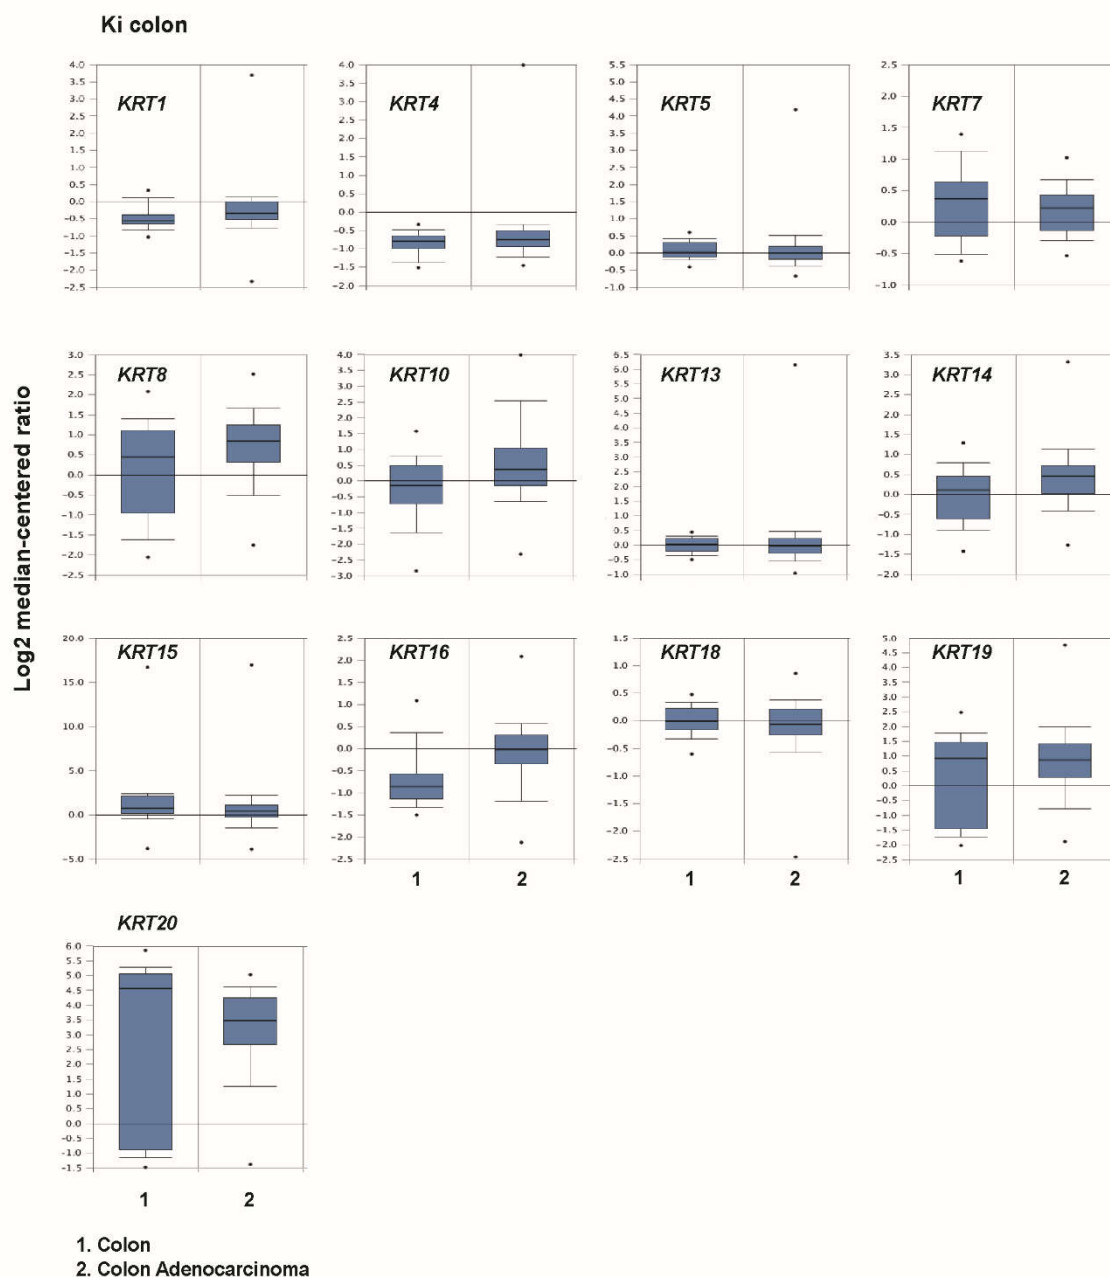

**Figure S1.** *KRTs* family genes expression analysis in colon cancer. Box plot comparing the expression of specific *KRTs* in normal (left plot) and cancer tissue (right plot) using data from the Oncomine database. Fold change in *KRTs* expression in colon cancer, shown as colon adenocarcinoma relative to normal colon tissue.

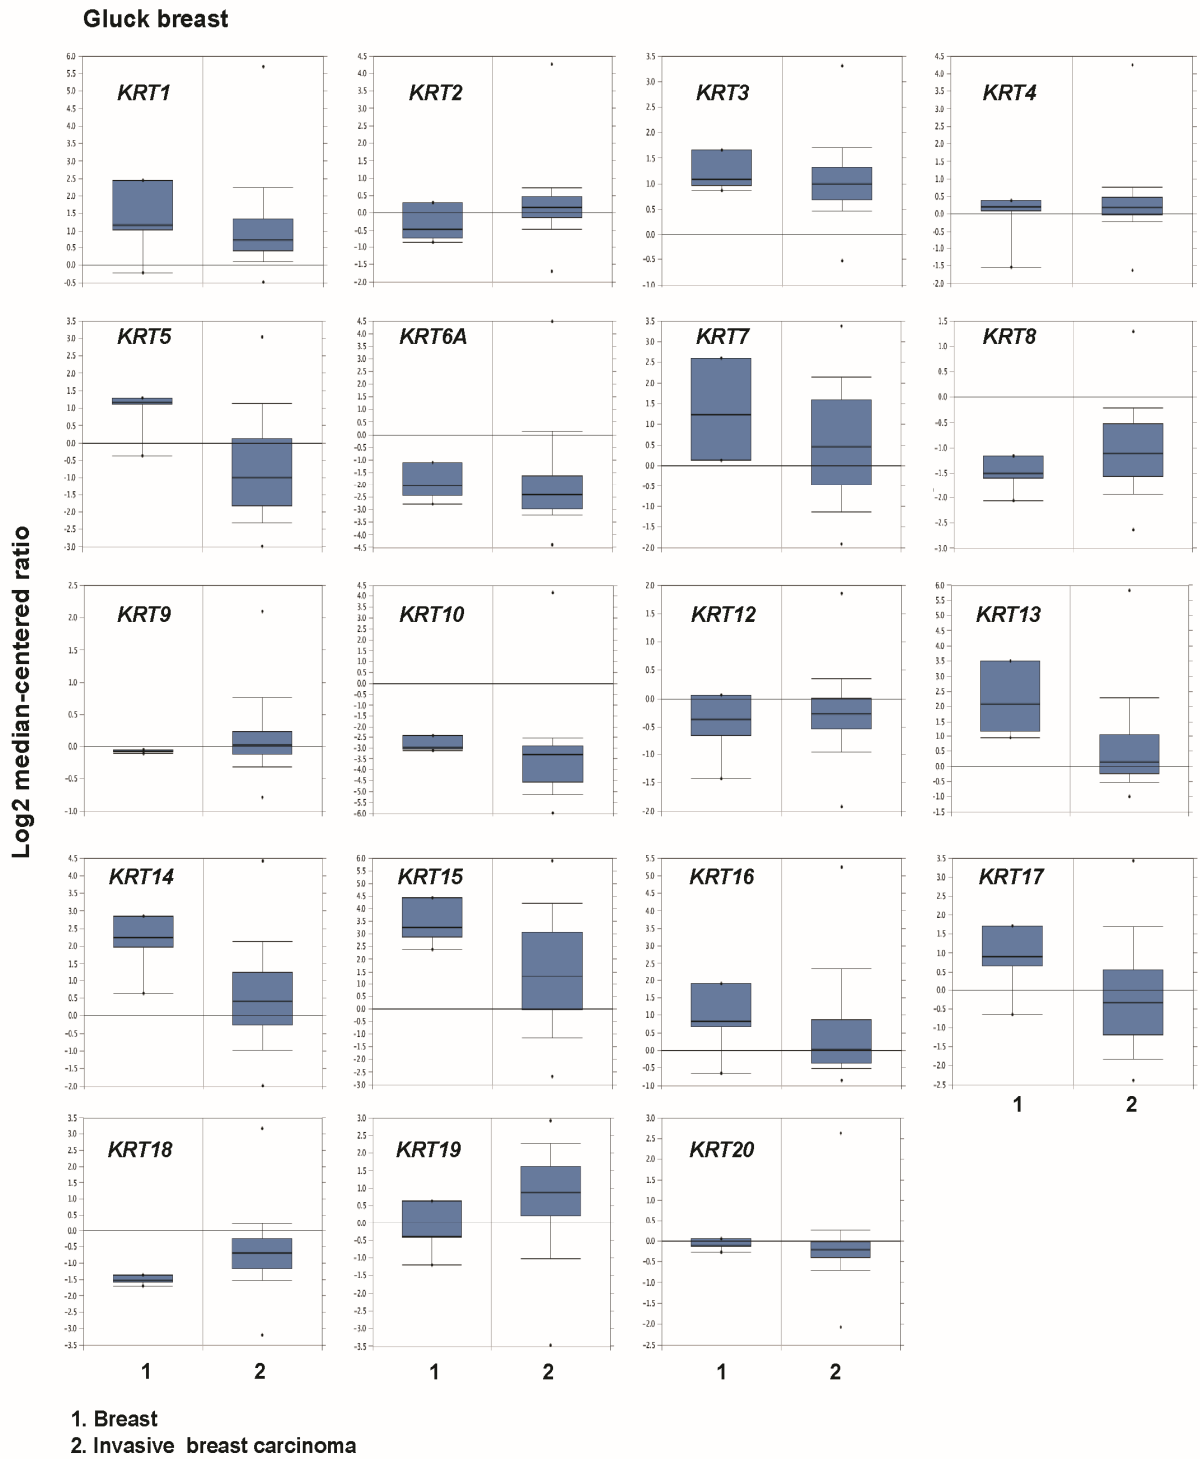

**Figure S2.** *KRTs* gene expression analysis in invasive breast carcinoma. Box plot comparing the expression of specific *KRTs* in normal (left plot) and cancer tissue (right plot) using data from the Oncomine database. Fold changes in *KRTs* expression in breast cancer, shown as invasive breast carcinoma relative to normal breast.

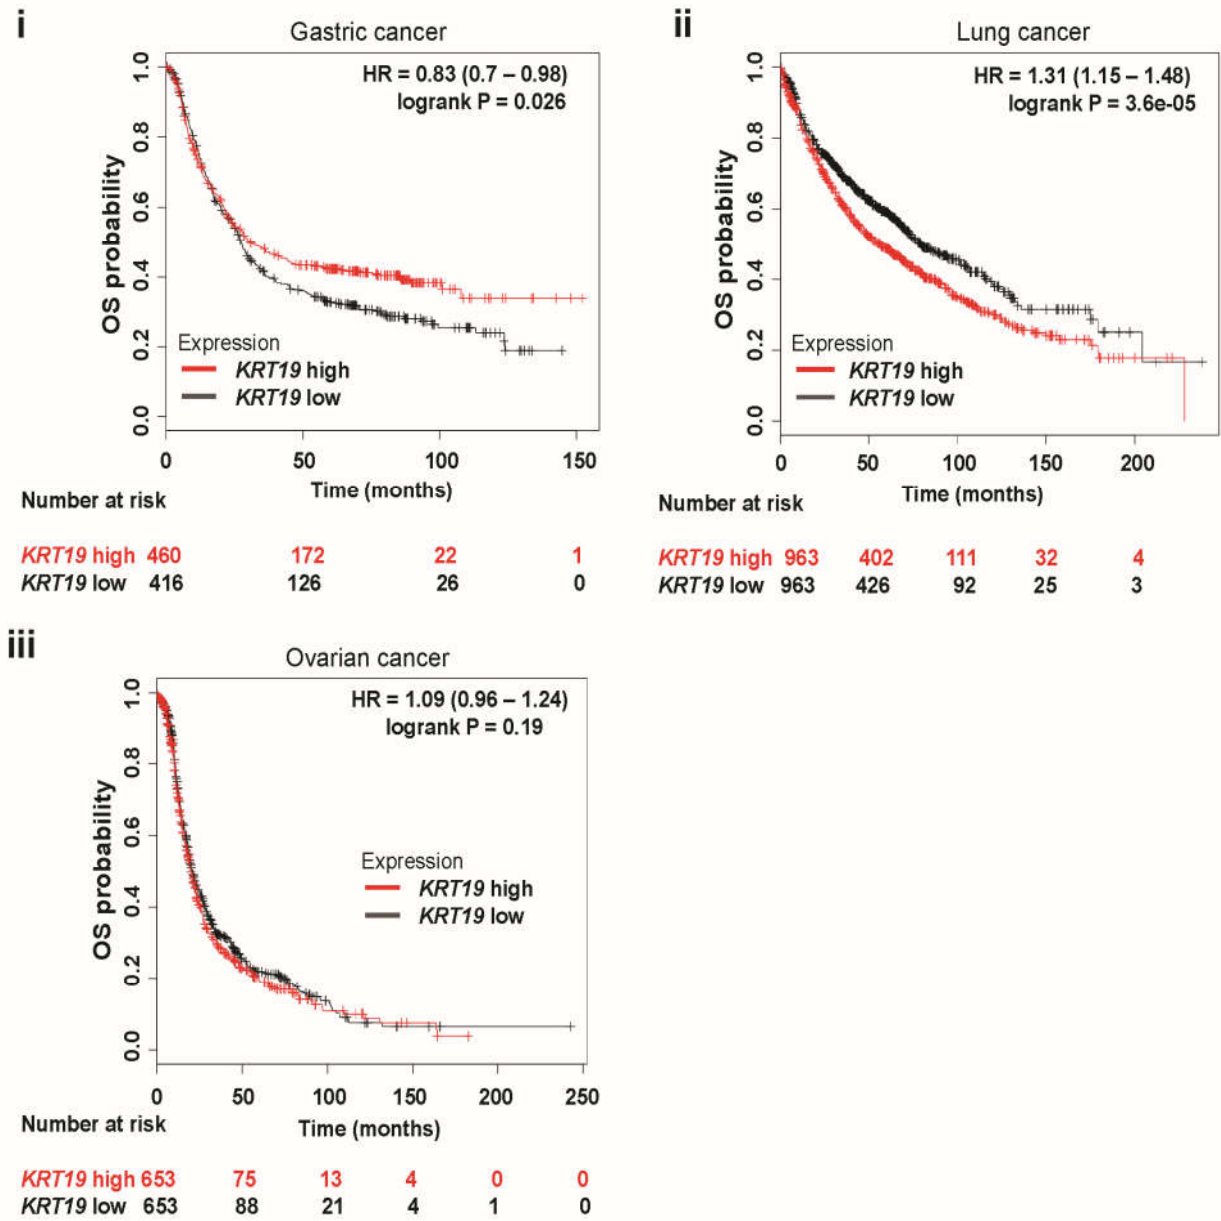

**Figure S3.** Kaplan-Meier curves for clinical outcomes of patients with (i) gastric cancer ( $n = 876$ ), (ii) lung cancer ( $n = 1926$ ), and (iii) ovarian cancer ( $n = 1306$ ), using Kaplan-Meier Plotter database, with high (red) and low (black) expression levels of *KRT19*.

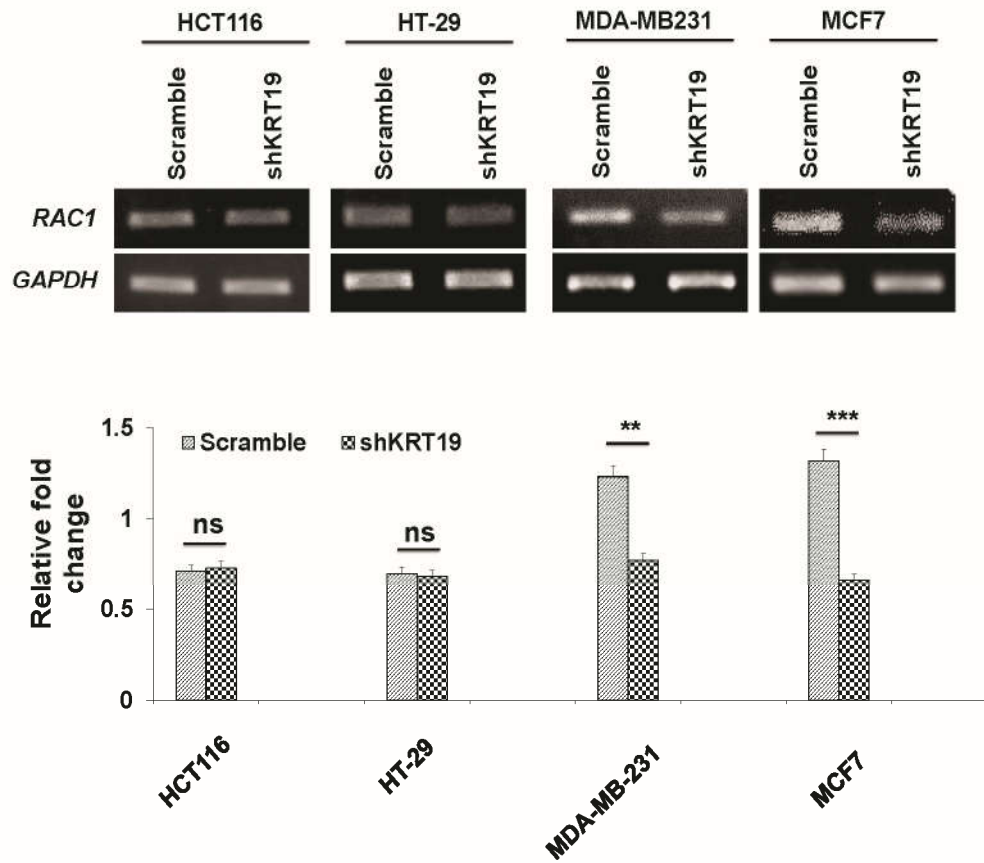

**Figure S4.** *RAC1* mRNA expression in scramble and shKRT19 cells analyzed by RT-PCR in the indicated cancer cell lines. *GAPDH* was used as a loading control. Bands were quantified by scanning densitometry and normalized to that of *GAPDH* (lower panel). Error bars represent  $\pm$  SDs of the means of three independent experiments (\*\* $p < 0.01$ , \*\*\* $p < 0.001$ , ns = non-significant).

RAC1 mRNA sequence

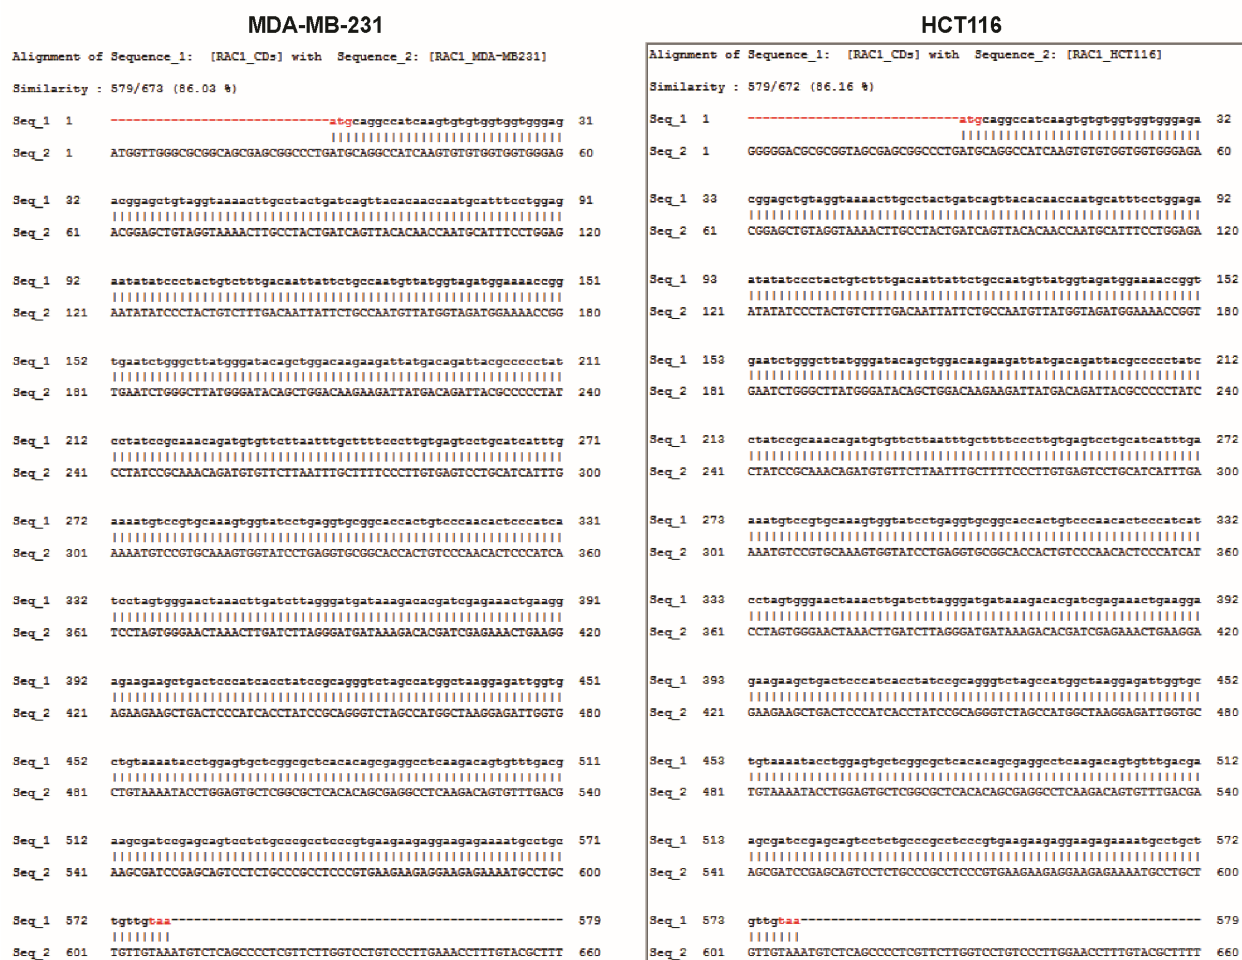

Figure S5. RAC1 cDNA sequencing performed using total RNA derived from MDA-MB231 and HCT116 cells.

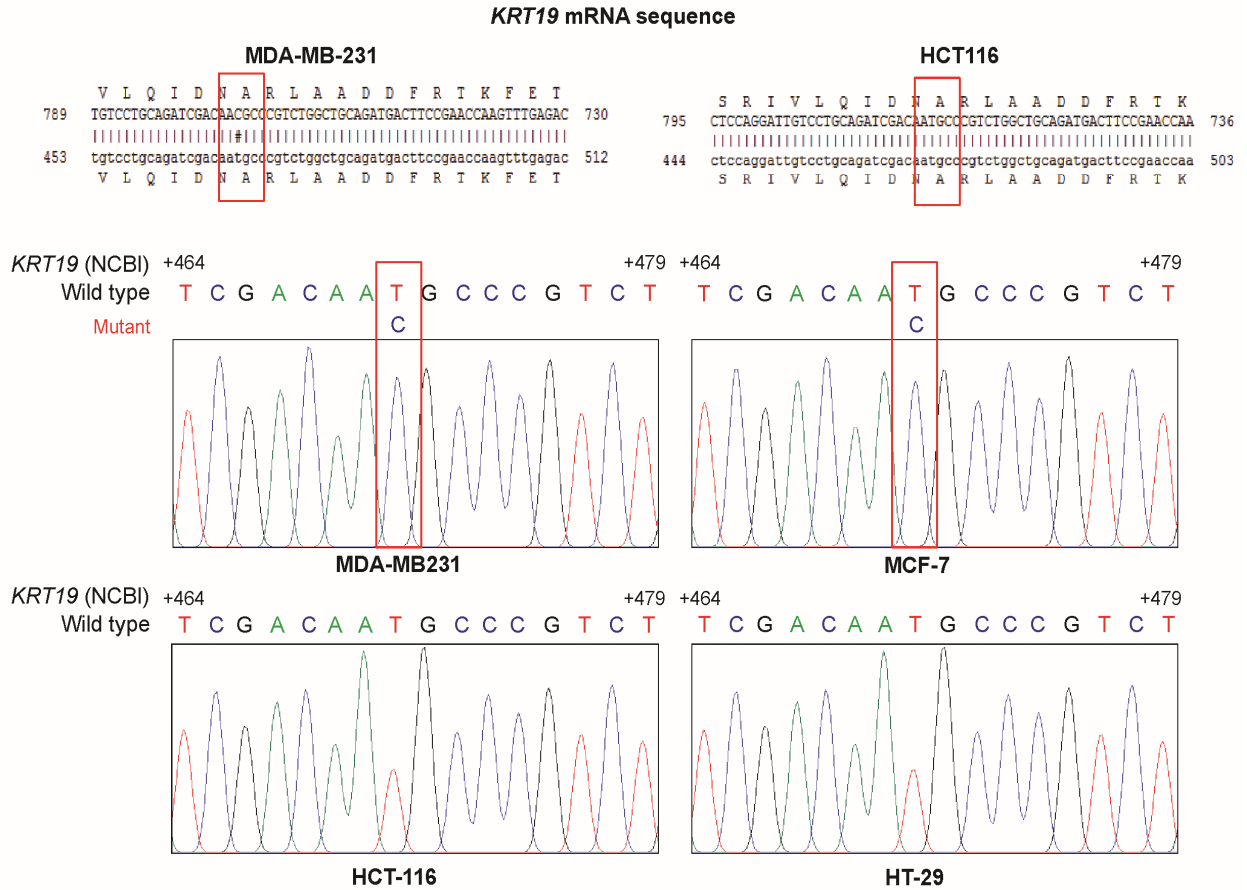

**Figure S6.** *KRT19* cDNA sequencing performed using total RNA derived from MDA-MB231, MCF7, HCT116, and HT29 cells. Chromatograms are shown for specific regions of sequences, and point mutations are indicated by red blocks.

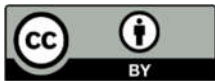

© 2019 by the authors. Submitted for possible open access publication under the terms and conditions of the Creative Commons Attribution (CC BY) license (<http://creativecommons.org/licenses/by/4.0/>).
